# Supplementary material
Source: Springer Nature journal article supplement (https://www.springermedizin.de/resource/supplementary/13054_2013_1948_MOESM4_ESM.pdf/9711854)

**BE ≥ -2**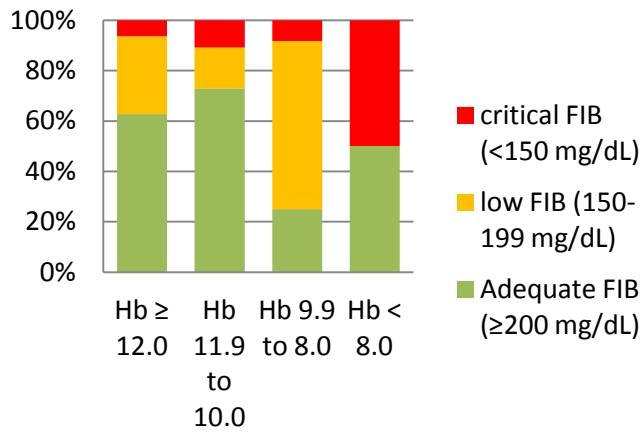**BE -2.1 to -6**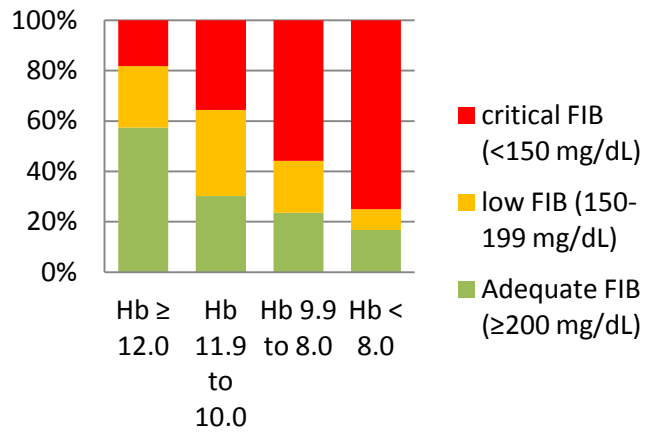**BE -6.1 to -10**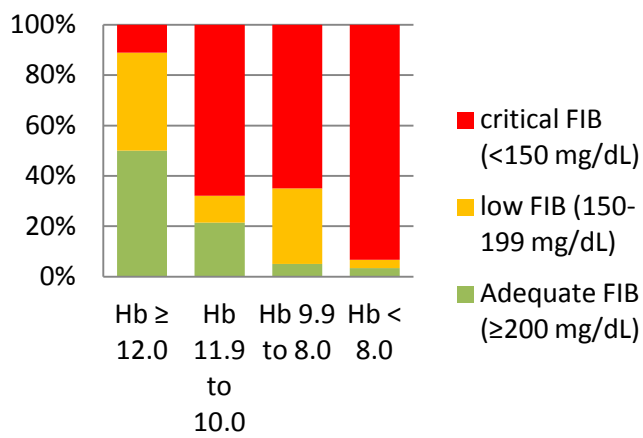**BE < -10**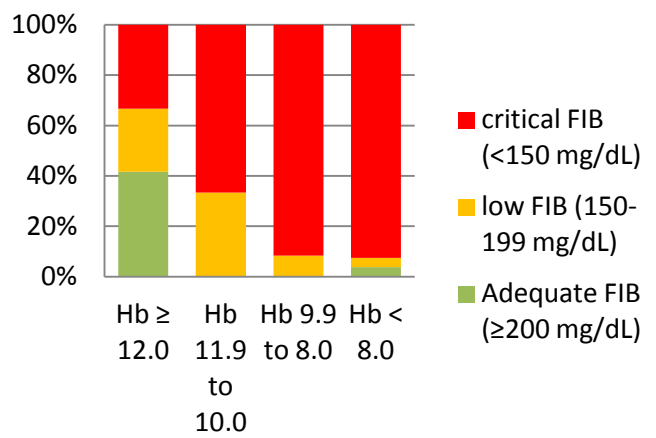

Supplement: MOESM4 [file 9711854]
